# Supplementary material for: The Effects of Age, Dosage, and Poverty on Second Language Learning through SparkLingTM in Infant Education Centers in Madrid, Spain
Source: MDPI journal article supplement (doi:10.3390/ijerph182312758), 2021-12-03

## Supplemental Results

### *Baseline measures of Spanish*

Prior to Week 1, children's Spanish level was assessed with the European Spanish MacArthur-Bates Communicative Developmental Inventory (CDI; [30]). A total of 380 families (275 Intervention, 105 CPC) returned valid CDI questionnaires. Baseline Spanish productive vocabularies ranged between 0 and 573 words, with the mean productive vocabulary of 140.4 ( $SD = 130.3$ ) words. These scores placed children between 1<sup>st</sup> and 99<sup>th</sup> percentile for their age, with the average being the 31.5<sup>th</sup> percentile. The mean CDI productive vocabularies and percentile scores did not differ between the Intervention and the CPC group,  $t(377) = 0.74, p = .46$ , 95% CI  $[-22.6, 49.8]$  and  $t(377) = -1.29, p = .20$ , 95% CI  $[-10.22, 2.12]$ . These results replicate our findings from our previous studies [27, 28].

### *Week 1 and Week 18 measures of Spanish and English comprehension*

Figure S1 shows mean English and Spanish CCT scores for Intervention and CPC children in Week 1 and in Week18. For English, 155 participants (118 Intervention, 37 CPC) had a valid score in both Week 1 and Week 18. The mean English CCT scores did not differ between the two groups at baseline ( $t(153) = 0.178, p = 0.86$ ). A repeated measures ANOVA with Time (September/February) and Group (I/CPC) as independent variables showed a significant main effect of Time,  $F(1, 153) = 65.35, p < .0001$  (Greenhouse-Geisser), partial  $\eta^2 = .30$  and an interaction of Time and Group,  $F(1, 153) = 6.25, p = .014$  (Greenhouse-Geisser), partial  $\eta^2 = .04$ , indicating the impact of the Intervention on the pattern of change over time. The interaction remained significant after controlling for SES (covariance analysis):  $F(1, 152) = 5.62, p = .019$ , partial  $\eta^2 = .036$ . For Spanish, 178 participants (138 Intervention, 40 CPC) had a valid score in both, September and February. There were no differences between the two Groups at baseline

( $t(176) = 0.36, p = 0.71$ ). There was a main effect of Time,  $F(1, 176) = 127.0, p < .0001$  (Greenhouse-Geisser), partial  $\eta^2 = .42$ , but the interaction of Time and Group was not significant,  $F(1, 176) = 0.46, p = .70$  (Greenhouse-Geisser), partial  $\eta^2 = .001$ . The Spanish CCT scores in the two groups, as predicted, increased in both groups equally over the course of the 18-week Intervention period after starting at similar levels. These results replicate our findings from the 2020 Study.

Supplemental Figure S1: Mean English (top panel) and Spanish (bottom panel) Computerized Comprehension Task (CCT) Scores in Week 1 (September) and Week 18 (February), for the Intervention and CPC children who completed the assessments at both time points. Error bars represent standard error.

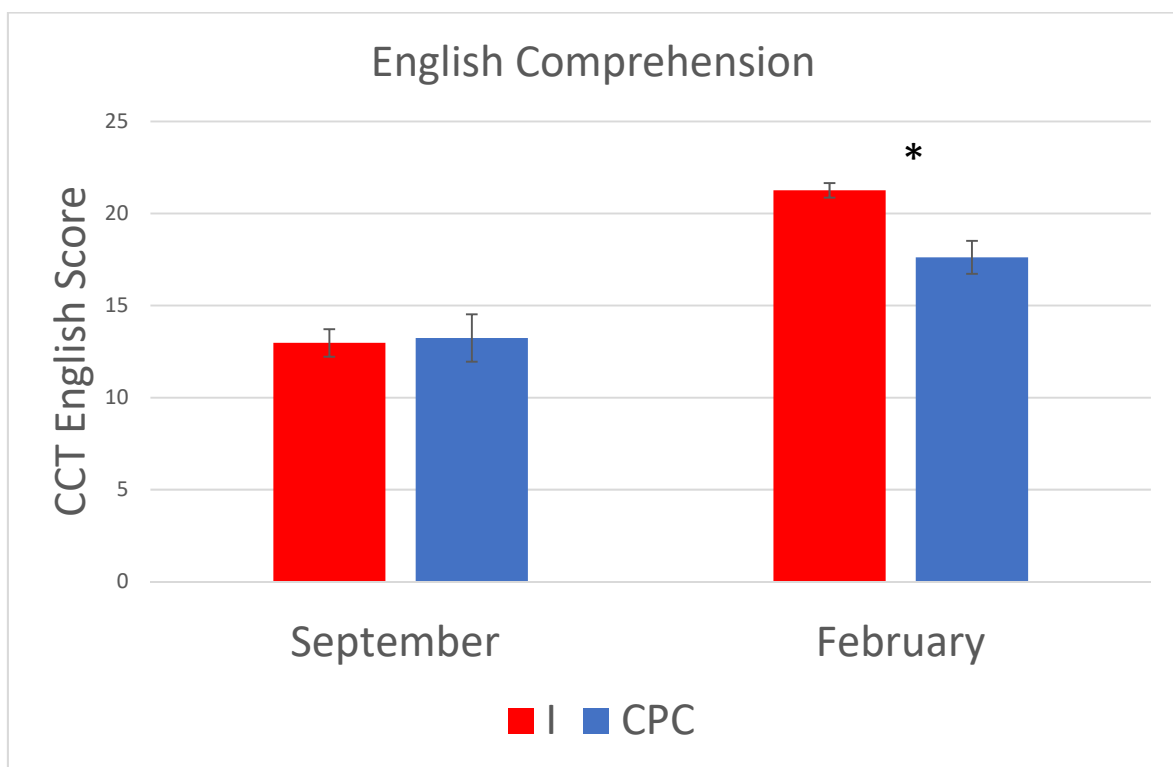

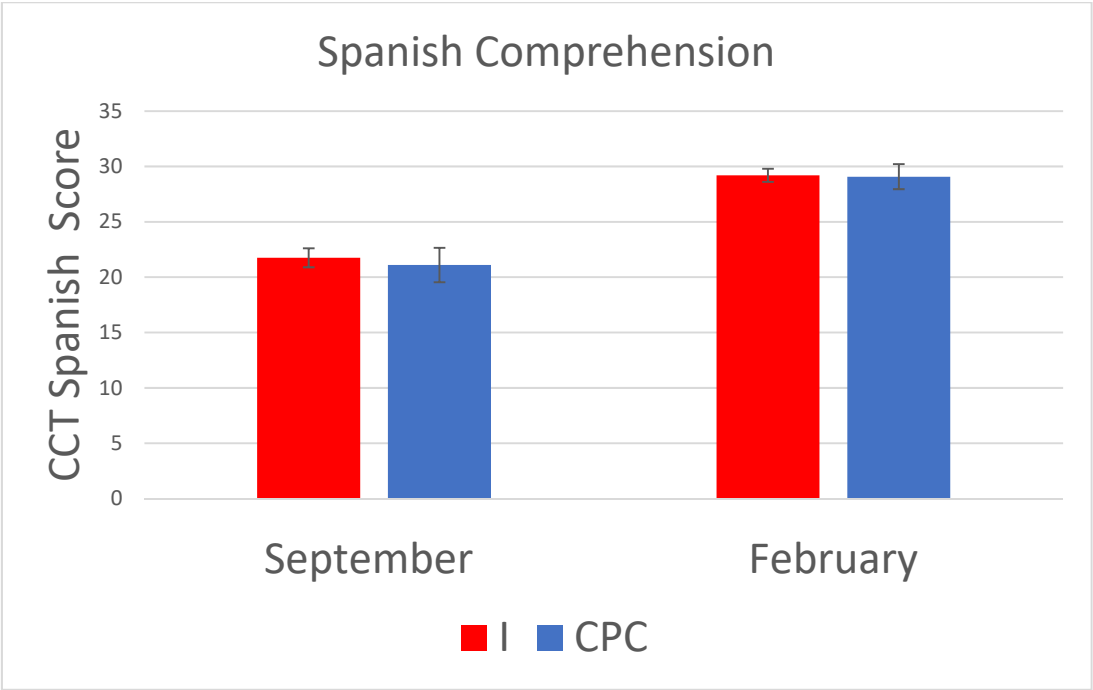

Supplement: s1 [file s1]
